# Supplementary material for: Octopamine Neuromodulation Regulates Gr32a-Linked Aggression and Courtship Pathways in Drosophila Males
Source: PubMed Central journal article supplement (PMC4031044; doi:10.1371/journal.pgen.1004356), 2014-05-22

Supplemental Figure 2 (Andrews et al.). Single GRASP component control brains demonstrate an absence of GFP expression

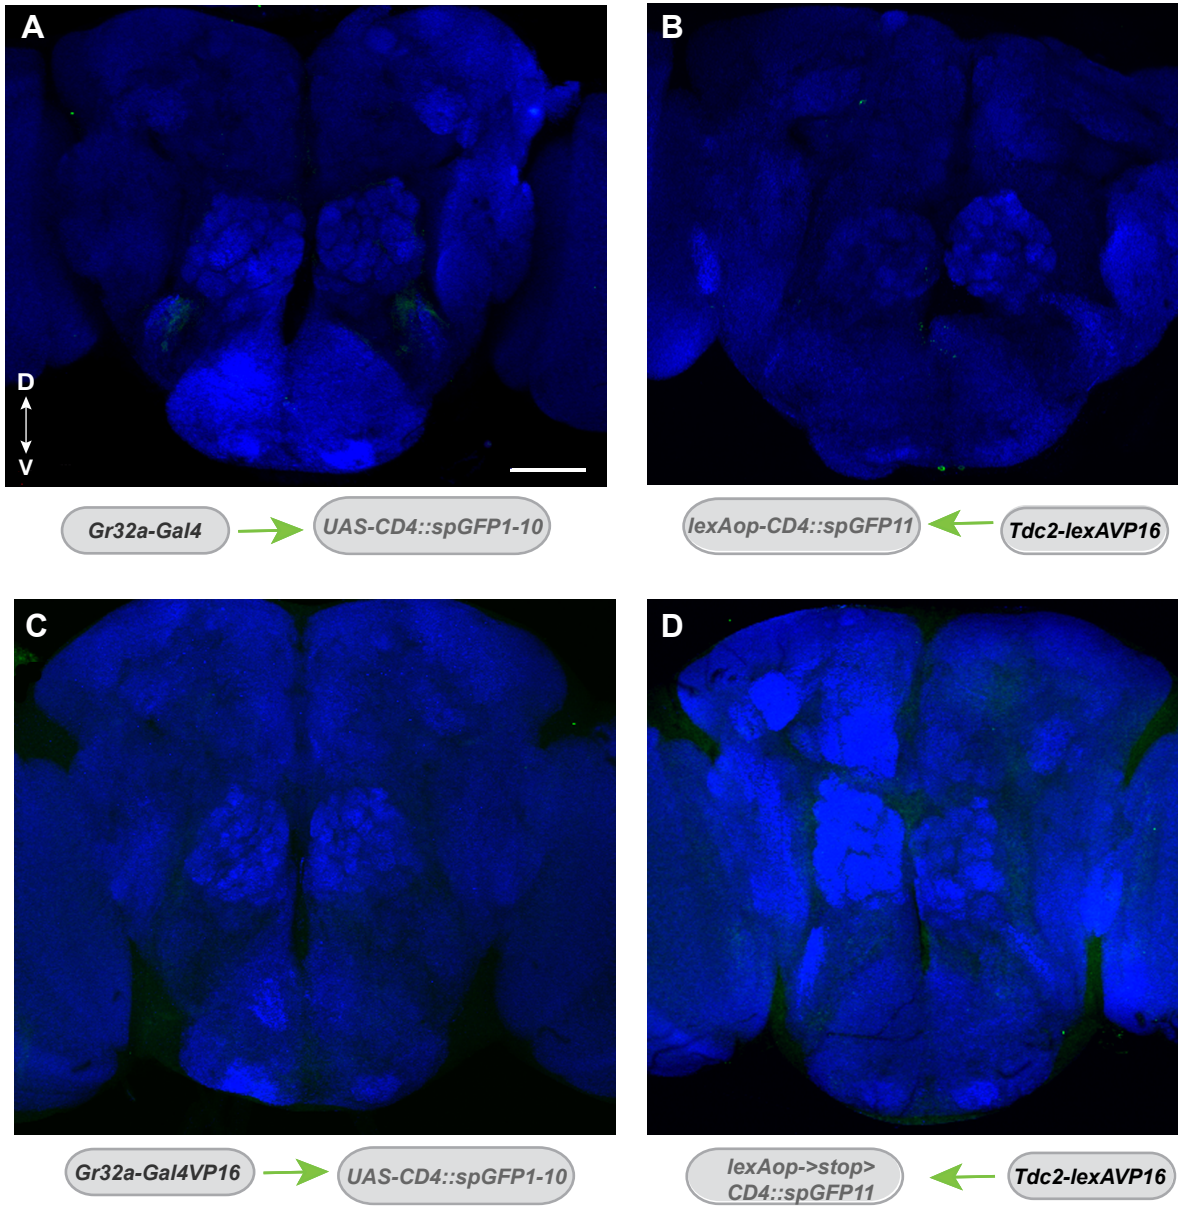

Supplement: pgen.1004356.s002.pdf [file pgen.1004356.s002.pdf]
