# Supplementary material for: Octopamine Neuromodulation Regulates Gr32a-Linked Aggression and Courtship Pathways in Drosophila Males
Source: PubMed Central journal article supplement (PMC4031044; doi:10.1371/journal.pgen.1004356), 2014-05-22

Supplementary Figure S3 (Andrews et al.). Gr22e and Gr59b neurons contact OA neurons in the subesophageal ganglion.

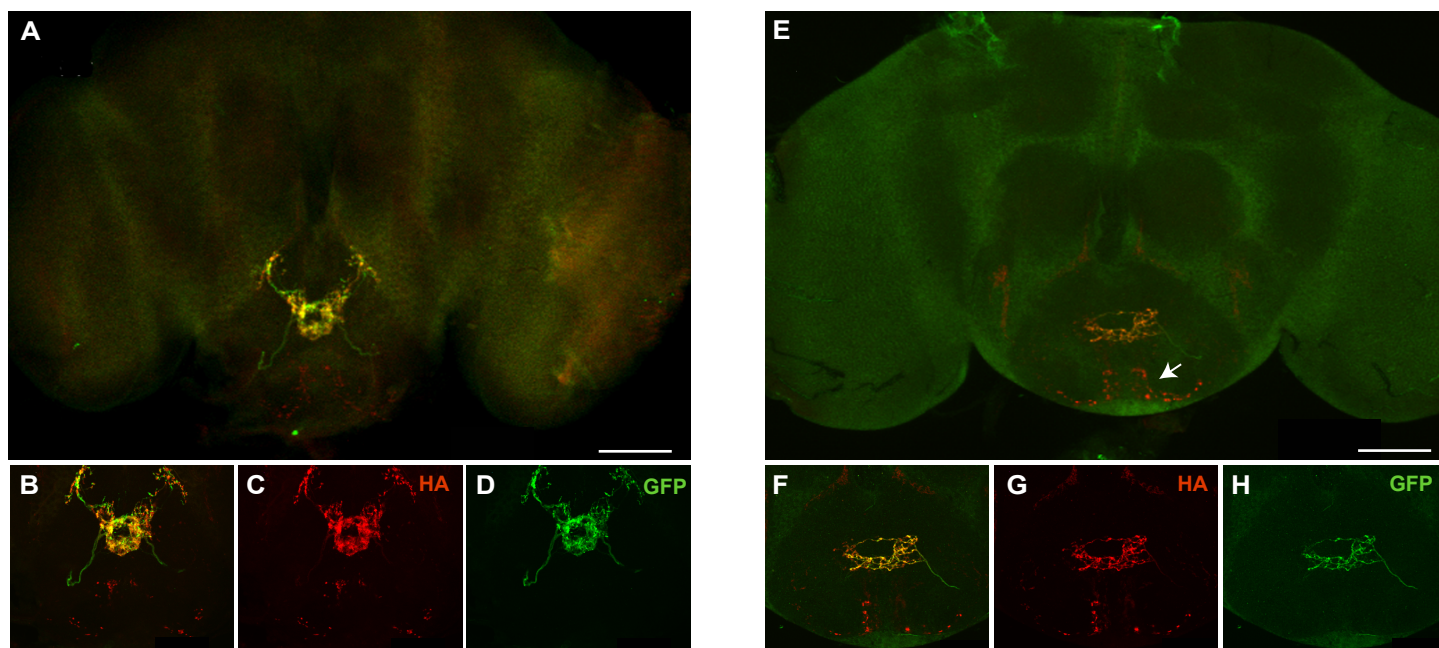

Supplement: pgen.1004356.s003.pdf [file pgen.1004356.s003.pdf]
