# Supplementary material for: Octopamine Neuromodulation Regulates Gr32a-Linked Aggression and Courtship Pathways in Drosophila Males
Source: PubMed Central journal article supplement (PMC4031044; doi:10.1371/journal.pgen.1004356), 2014-05-22

Andrews et al., Figure S4. Gr47a-expressing neurons do not contact OA neurons

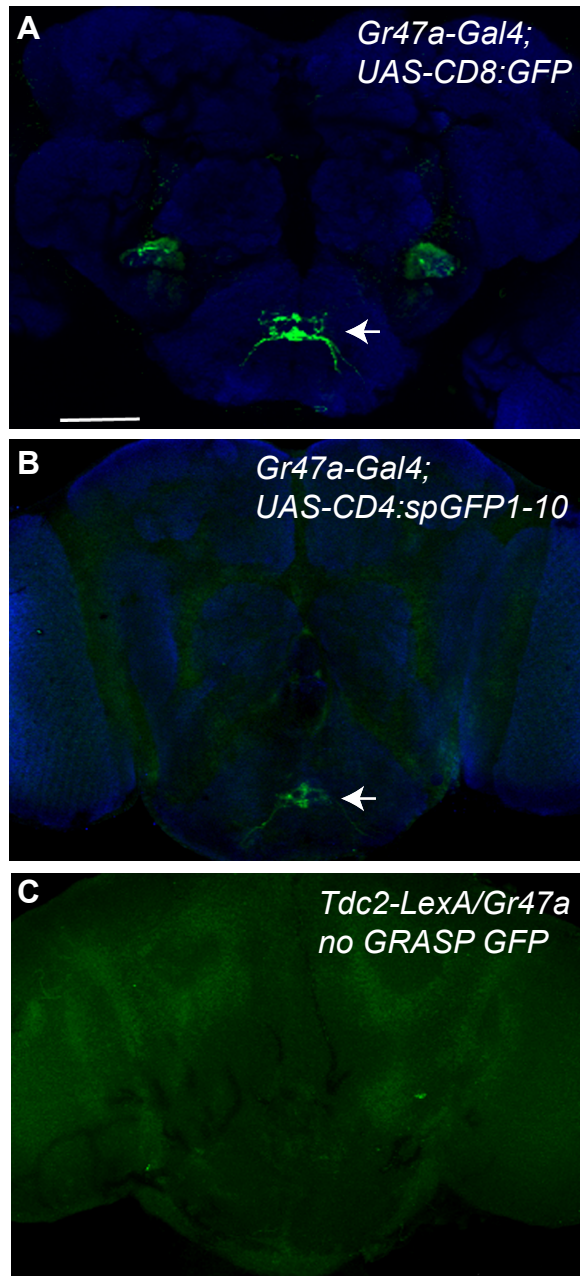

Supplement: pgen.1004356.s004.pdf [file pgen.1004356.s004.pdf]
