# Supplementary material for: Octopamine Neuromodulation Regulates Gr32a-Linked Aggression and Courtship Pathways in Drosophila Males
Source: PubMed Central journal article supplement (PMC4031044; doi:10.1371/journal.pgen.1004356), 2014-05-22

**Figure S7 (Andrews et al.). Quantification of aggression parameters in Gr32a-expressing and OA deficient males**

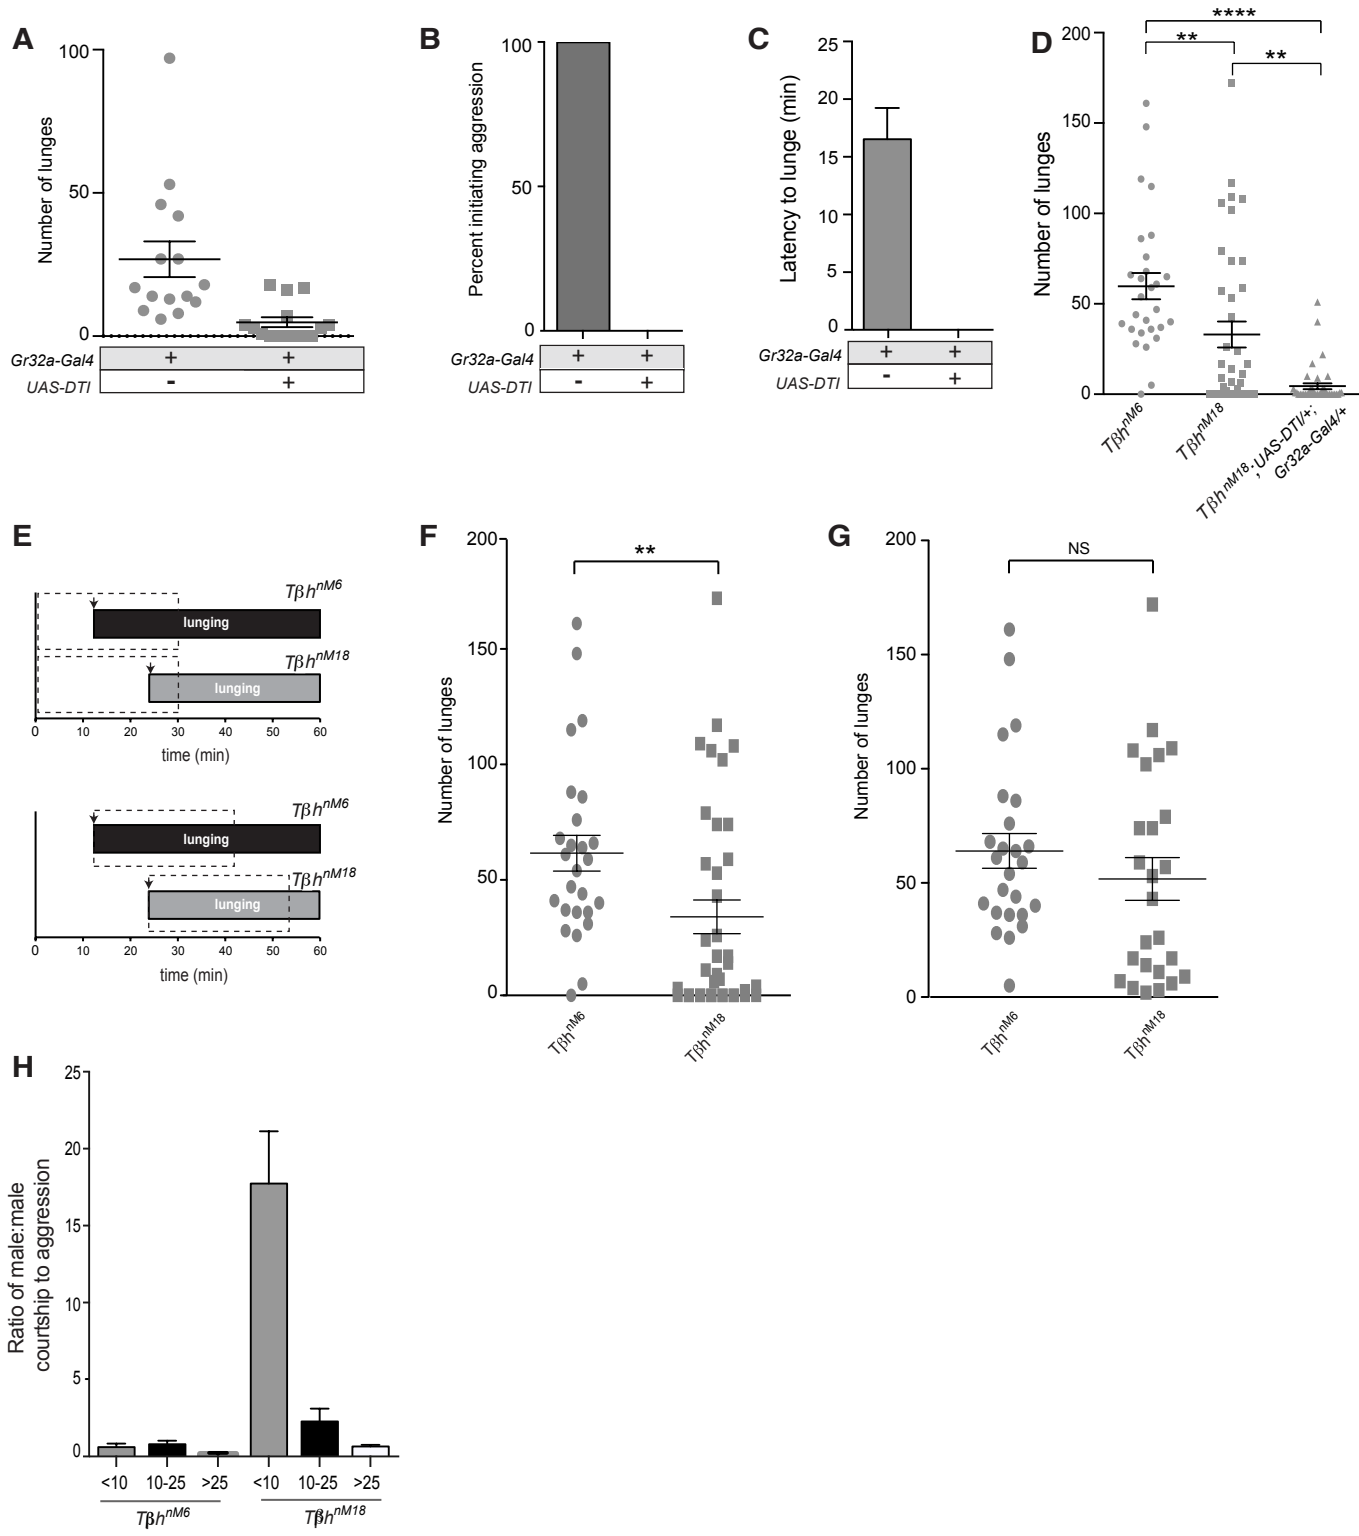

Supplement: pgen.1004356.s007.pdf [file pgen.1004356.s007.pdf]
